# Supplementary material
Source: PubMed Central journal article supplement (PMC2711294)

Biophysical Journal, Volume 96

**Supporting Material**

**Absolute quantitation of bacterial biofilm adhesion and viscoelasticity by microbead force spectroscopy**

Peter C. Y. Lau, John R. Dutcher, Terry J. Beveridge and Joseph S. Lam

## SUPPLEMENTARY MATERIAL

### TABLES

**TABLE S1 Examples of quantitative bacterial adhesion studies by AFM in the literature**

| Subjects of Study                                            | Probing Method            | Adhesive Forces measured                                                                                                                             | Authors (Year)                   |
|--------------------------------------------------------------|---------------------------|------------------------------------------------------------------------------------------------------------------------------------------------------|----------------------------------|
| Sulfate-reducing bacteria<br>silicon nitride                 | Native tip on<br>cells    | 3.9-4.3 nN (cell surface)<br>5.1-5.9 nN (cell-substratum boundary)<br>6.5-6.8 nN (cell-cell boundary)                                                | Fang <i>et al.</i><br>(2000)     |
| <i>Bacillus mycoides</i> spores<br>glass                     | Cell probe on<br>surfaces | 7.4 ± 3.7 nN (hydrophilic glass)<br>49.4 ± 14.4 nN (hydrophobic-coated glass)                                                                        | Bowen <i>et al.</i><br>(2002)    |
| <i>Pseudomonas aeruginosa</i><br><i>Candida parapsilosis</i> | Cell probe on<br>surfaces | 2.0 ± 0.4 nN (bacterium-yeast interaction)                                                                                                           | Emerson <i>et al.</i><br>(2004)  |
| <i>Escherichia coli</i><br>silicones                         | Cell probe on<br>surfaces | 7.35 ± 2.31 nN (silicone)<br>22.75 ± 3.19 nN (fluoroalkylsilane coated<br>silicone)                                                                  | Cao <i>et al.</i><br>(2006)      |
| <i>Pseudomonas aeruginosa</i><br>mica                        | Cell probe on<br>surfaces | 95 nN (pilus-mica rupture force)                                                                                                                     | Touhami <i>et al.</i><br>(2006)  |
| <i>Pseudomonas</i> sp.<br>metals                             | Cell probe on<br>surfaces | 5.6 ± 0.8 nN (aluminum)<br>2.2 ± 0.5 nN (stainless steel)<br>0.5 ± 0.2 nN (copper)                                                                   | Sheng <i>et al.</i><br>(2007)    |
| <i>Mycobacterium bovis</i><br>CH <sub>3</sub> surfaces       | Modified tip<br>on cells  | 3.032 ± 0.102 nN (CH <sub>3</sub> )                                                                                                                  | Alsteens <i>et al.</i><br>(2007) |
| <i>Streptococcus mutans</i><br>laminin films                 | Modified tip<br>on cells  | 5.0 nN (parent strain, pH 5.8)<br>4.9 nN (parent strain, pH 6.8)<br>1.5 nN (mutant strain, pH 5.8)<br>2.1 nN (mutant strain, pH 6.8)                 | Busscher <i>et al.</i><br>(2007) |
| <i>Pseudomonas aeruginosa</i><br>glass and organics          | Colloid probe<br>on cells | 1.4 nN (wild-type to glass)<br>3.9 nN (B-band LPS mutant to glass)<br>1.7-3.5 nN (wild-type to organics)<br>1-2.5 nN (B-band LPS mutant to organics) | Abu-Lail <i>et al.</i><br>(2007) |

**TABLE S2 Examples of quantitative viscoelastic studies of intact biofilms in the literature**

| Subjects of Study                                            | Stressing Method                                           | Viscoelastic Properties measured                                                                                                                       | Authors (Year)                  |
|--------------------------------------------------------------|------------------------------------------------------------|--------------------------------------------------------------------------------------------------------------------------------------------------------|---------------------------------|
| Mixed culture and <i>Pseudomonas aeruginosa</i>              | Flow cell and light microscopy (shear)                     | Shear modulus = 27 Pa<br>Apparent elastic modulus = 17-40 Pa<br>Yield strength = 5.09-10.11 Pa<br>Viscosity = $7.9 \times 10^4 - 1.9 \times 10^5$ Pa·s | Stoodley <i>et al.</i> (1999)   |
| <i>Pseudomonas aeruginosa</i>                                | Film rheometry (compression)                               | Apparent elastic modulus = $6500 \pm 500$ Pa<br>Yield strength = $990 \pm 90$ Pa                                                                       | Korstgens <i>et al.</i> (2001)  |
| <i>Pseudomonas aeruginosa</i>                                | Flow cell and light microscopy (shear)                     | Shear modulus = $64.67 \pm 21.03$ Pa<br>Viscosity = $8.0 \times 10^3$ Pa·s                                                                             | Klapper <i>et al.</i> (2002)    |
| <i>Pseudomonas aeruginosa</i>                                | Flow cell and light microscopy (shear)                     | Shear modulus = 1-280 Pa<br>Viscosity = $3.6 \times 10^5 \pm 2.6 \times 10^5$ Pa·s                                                                     | Stoodley <i>et al.</i> (2002)   |
| <i>Desulfovibrio</i> sp.                                     | Flow cell and light microscopy (shear)                     | Elastic modulus = 2.5-5 Pa<br>Yield point ~ 0.27 m/s                                                                                                   | Dunsmore <i>et al.</i> (2002)   |
| Mixed culture                                                | Rotating disk rheometry (shear)                            | Shear modulus = 0.2-24 Pa<br>Viscous coefficient = 10-3000 Pa                                                                                          | Towler <i>et al.</i> (2003)     |
| <i>Streptococcus mutans</i>                                  | Parallel plate rheometry (shear)                           | Effective shear modulus = $1.9 \pm 3.8 \times 10^2$ Pa<br>Effective viscosity = $2.8 \pm 6.4 \times 10^5$ Pa·s                                         | Vinogradov <i>et al.</i> (2004) |
| <i>Streptococcus mutans</i><br><i>Pseudomonas aeruginosa</i> | Parallel plate rheometry (shear)                           | Effective shear modulus = $10^{-2}$ - $10^6$ Pa<br>Effective viscosity = $10$ - $10^8$ Pa·s                                                            | Shaw <i>et al.</i> (2004)       |
| Mixed species<br>photosynthetic mats                         |                                                            |                                                                                                                                                        |                                 |
| <i>Staphylococcus aureus</i>                                 | Flow cell and light microscopy (shear)                     | Shear modulus = $4.9 \pm 3.7$ Pa<br>Viscosity = $3500 \pm 2900$ Pa·s                                                                                   | Rupp <i>et al.</i> (2005)       |
| <i>Streptococcus mutans</i>                                  | Microindentation<br>Confocal microscopy (compression)      | Storage modulus = 0.73-8.56 kPa<br>Loss modulus = 5.03-10.4 kPa<br>Viscosity = 256-2140 Pa·s                                                           | Cense <i>et al.</i> (2006)      |
| <i>Proteus mirabilis</i>                                     | Viscometry<br>Rotational and oscillatory rheometry (shear) | Storage modulus = 900-1000 Pa<br>Loss modulus = 125-130 Pa<br>Viscosity = 50000 Pa·s                                                                   | Lahaye <i>et al.</i> (2007b)    |
| Nano-filtration membrane biofilm                             | Rotational and oscillatory rheometry (shear)               | Elasticity: 3000-3500 Pa<br>Viscosity: 800-1200 Pa                                                                                                     | Houari <i>et al.</i> (2008)     |

## FIGURES

FIGURE S1 Combined histogram showing frequency distribution of *Pseudomonas aeruginosa* adhesive forces to glass under standard conditions. Frequency distribution of adhesive forces is shown from six independent experiments per early biofilm sample and four independent experiments per mature biofilm sample. Each experiment consists of 10 replicate force plots at standard loading force, contact time and ramp velocity (SFTV).

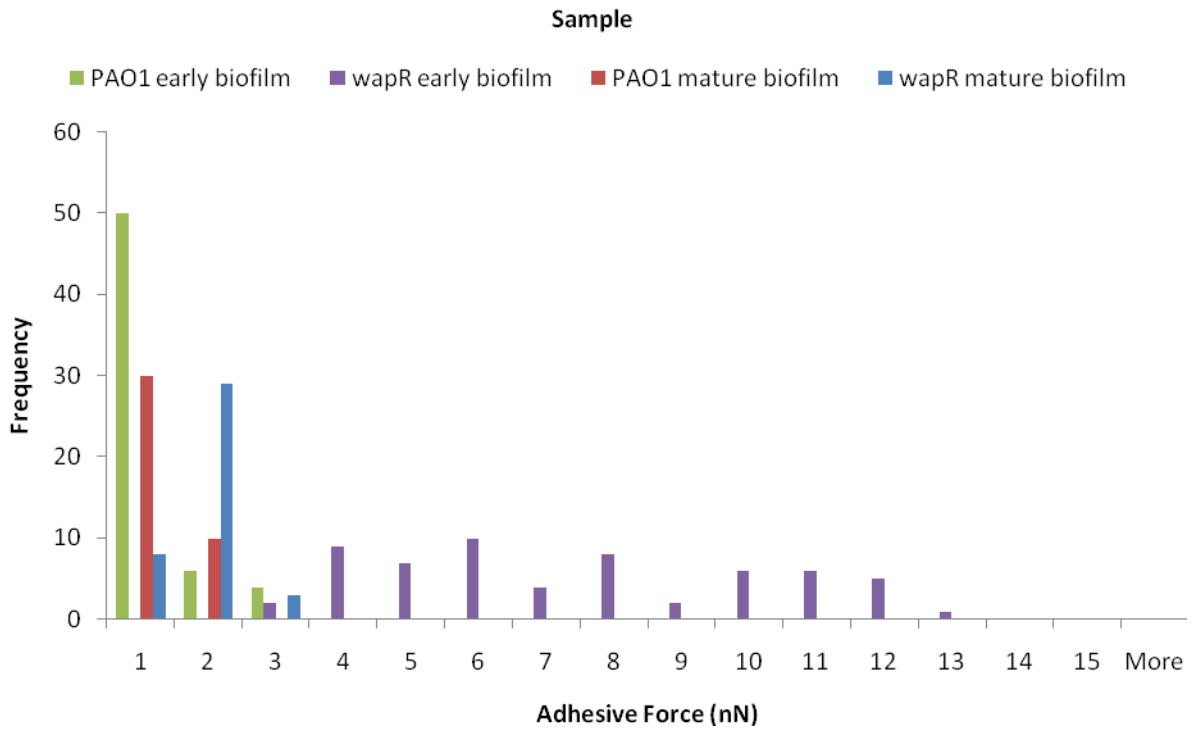

FIGURE S2 Loading force and contact time dependence of *Pseudomonas aeruginosa* adhesive force to glass. (A) PAO1 early biofilm. (B) wapR early biofilm. (C) PAO1 mature biofilm. (D) wapR mature biofilm. Means and standard errors of data are shown from three independent experiments per early biofilm sample and two independent experiments per mature biofilm sample. Each experiment consists of 10 replicate force plots for each combination of loading force and contact time.

A

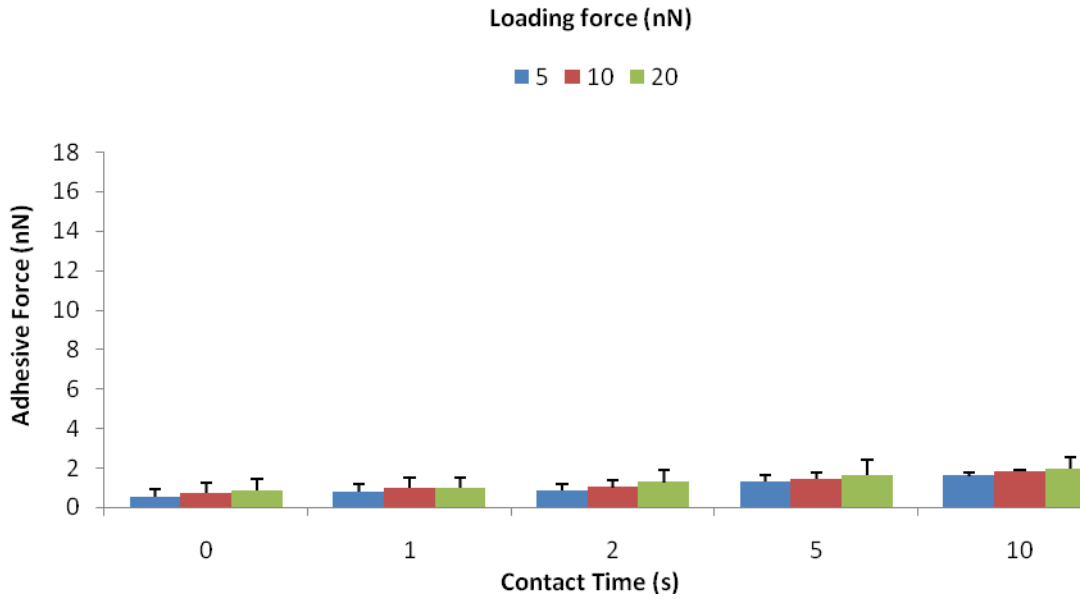

B

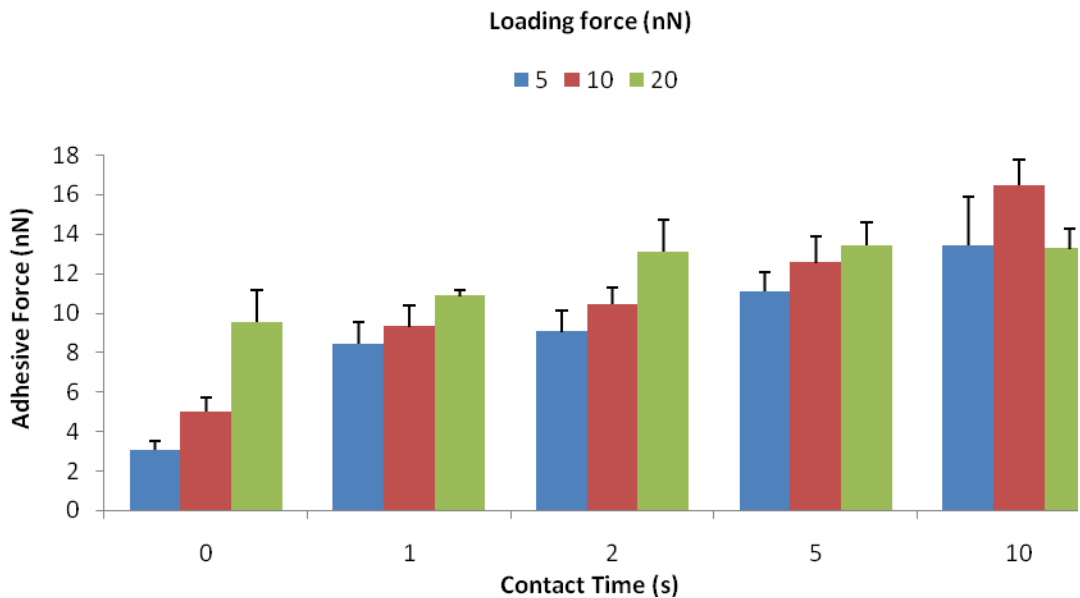

C

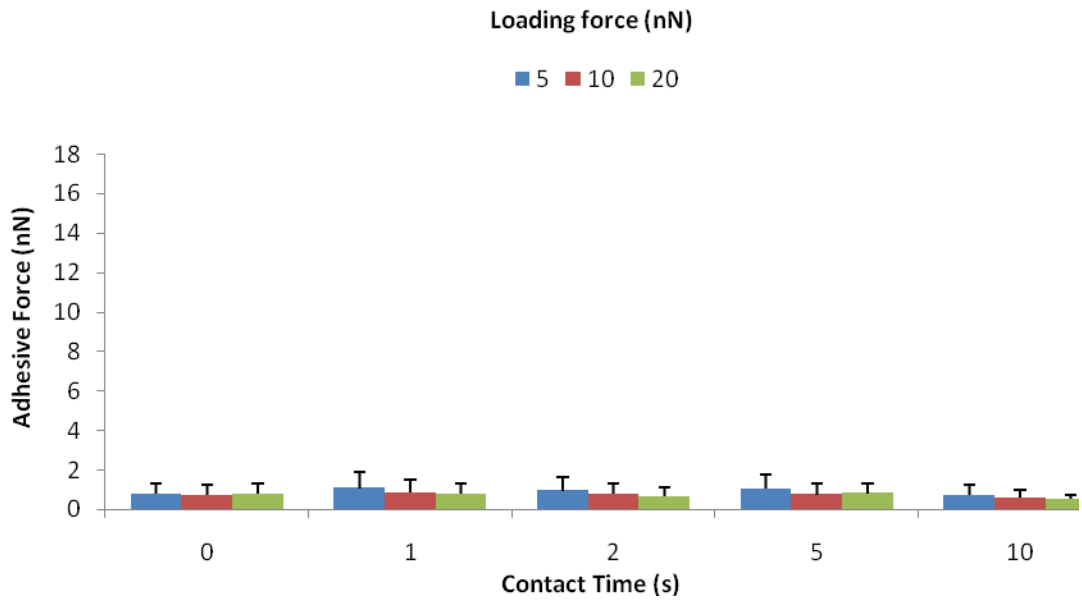

D

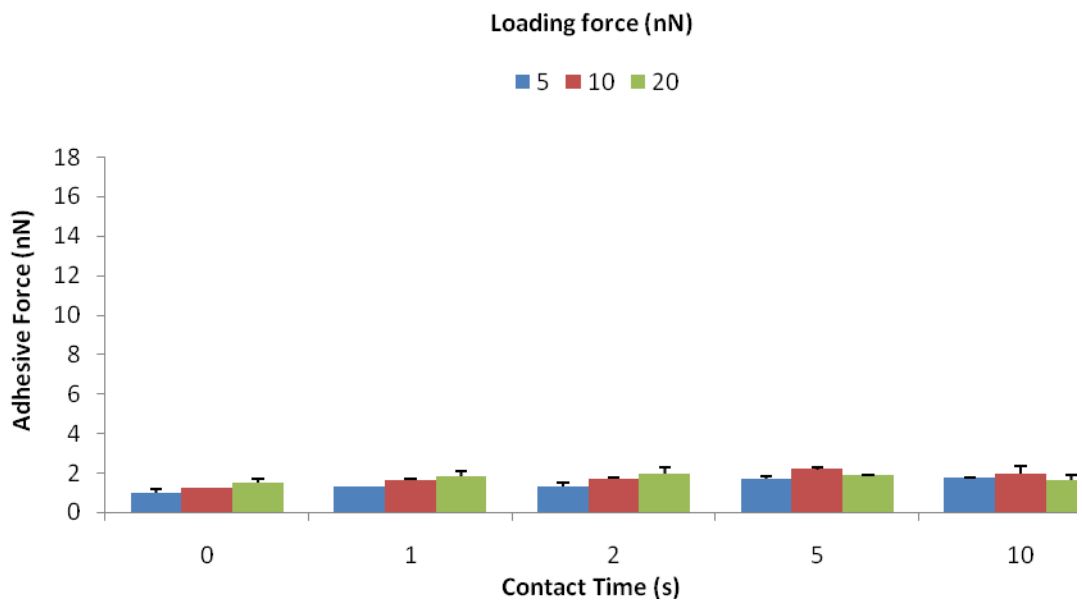

FIGURE S3 Loading force and contact time dependence of *Pseudomonas aeruginosa* adhesive pressure to glass. (A) PAO1 early biofilm. (B) wapR early biofilm. (C) PAO1 mature biofilm. (D) wapR mature biofilm. Means and standard errors of data are shown from three independent experiments per early biofilm sample and two independent experiments per mature biofilm sample. Each experiment consists of 10 replicate force plots for each combination of loading force and contact time.

A

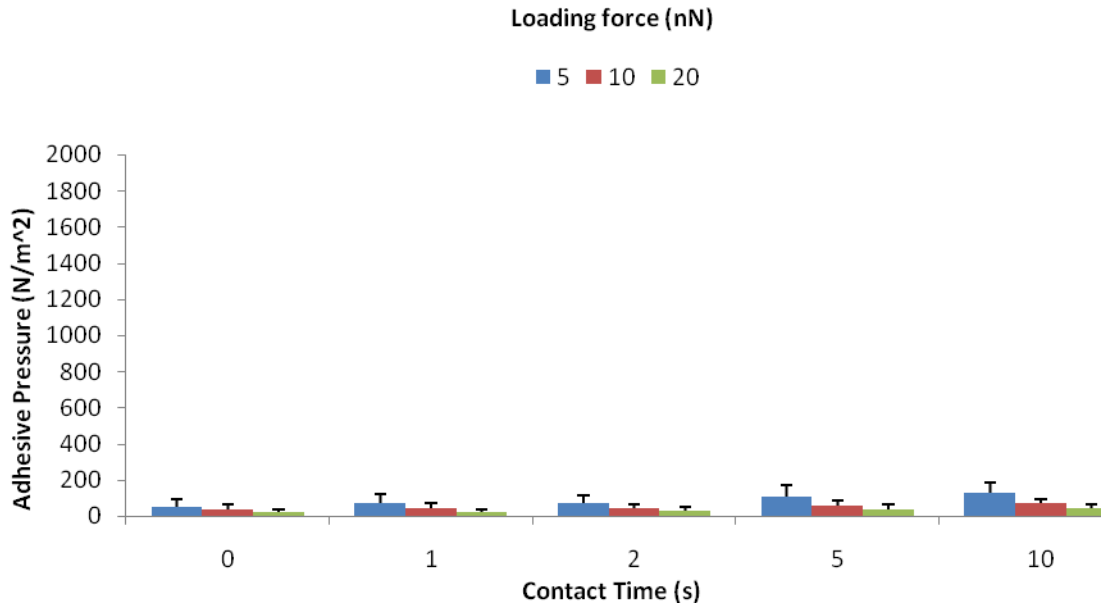

B

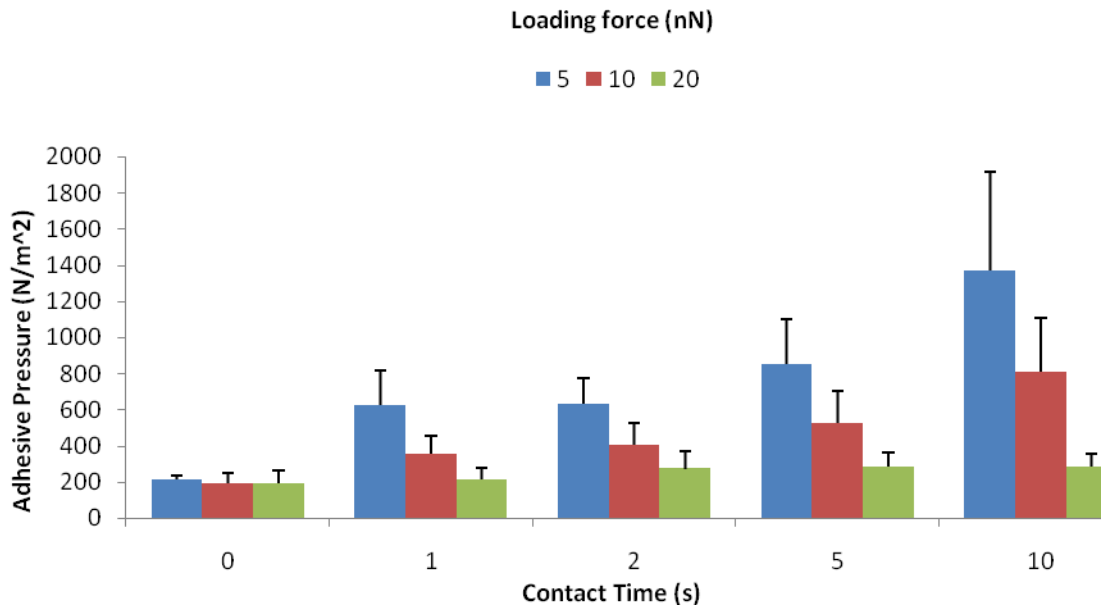

C

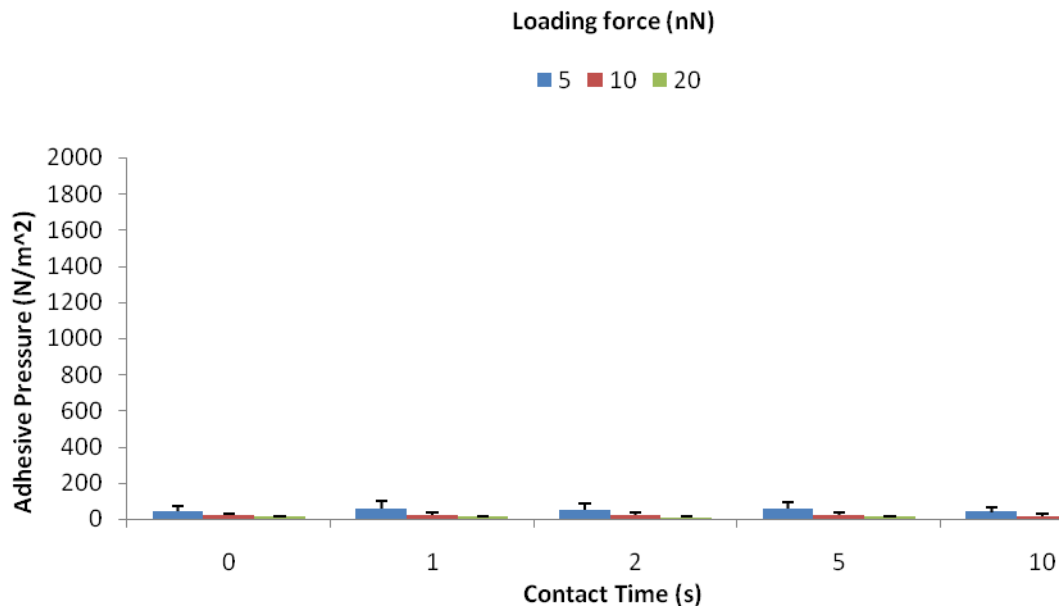

D

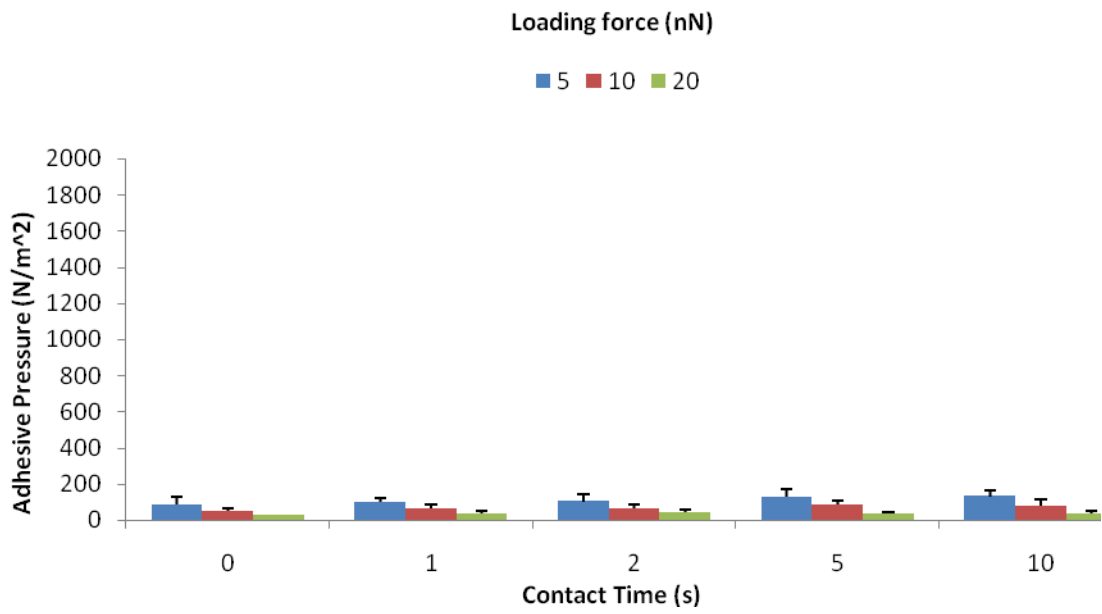



FIGURE S4 Retraction velocity and contact time dependence of *Pseudomonas aeruginosa* adhesive force to glass. (A) PAO1 early biofilm. (B) wapR early biofilm. (C) PAO1 mature biofilm. (D) wapR mature biofilm. Means and standard errors of data are shown from three independent experiments per early biofilm sample and two independent experiments per mature biofilm sample. Each experiment consists of 10 replicate force plots for each combination of retraction velocity and contact time.

A

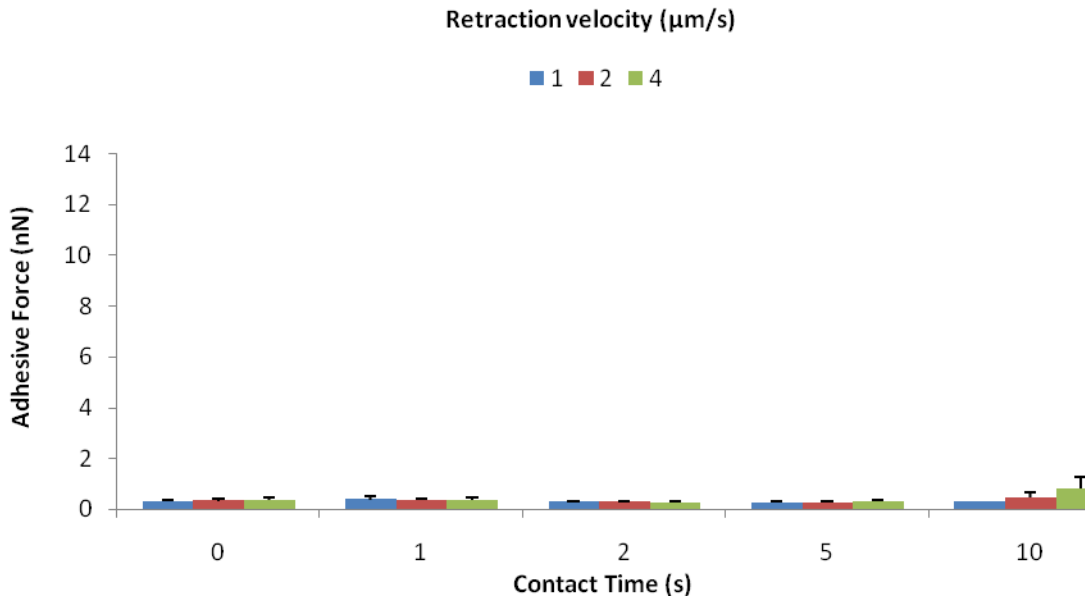

B

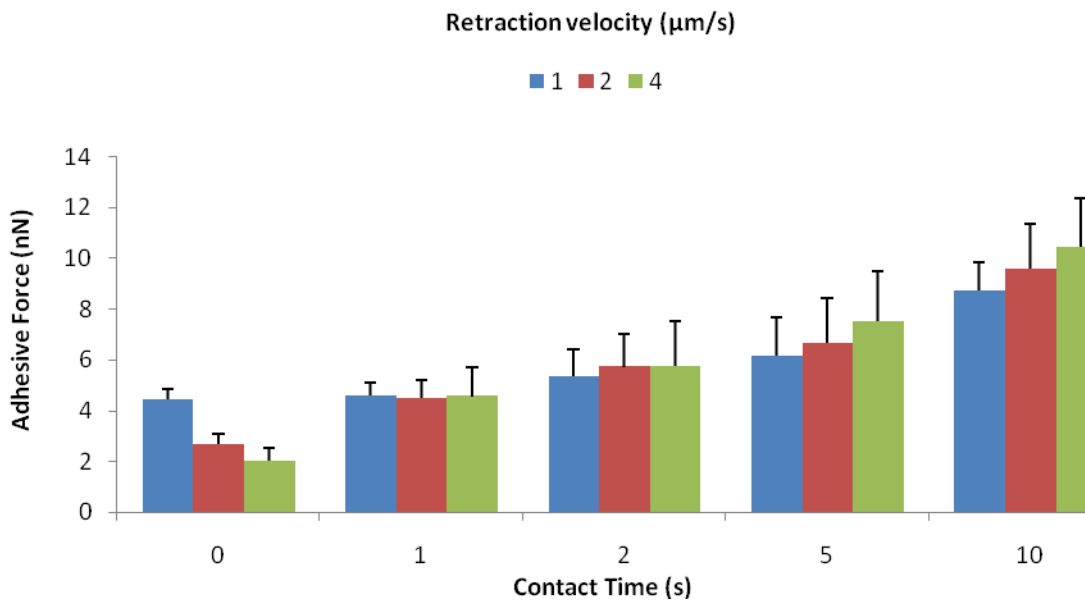

C

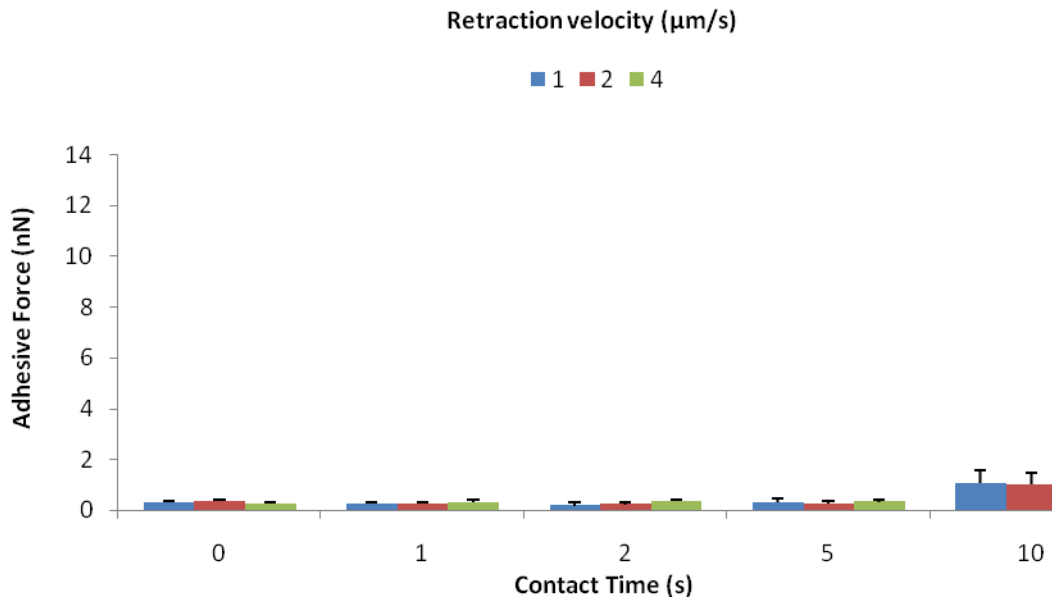

D

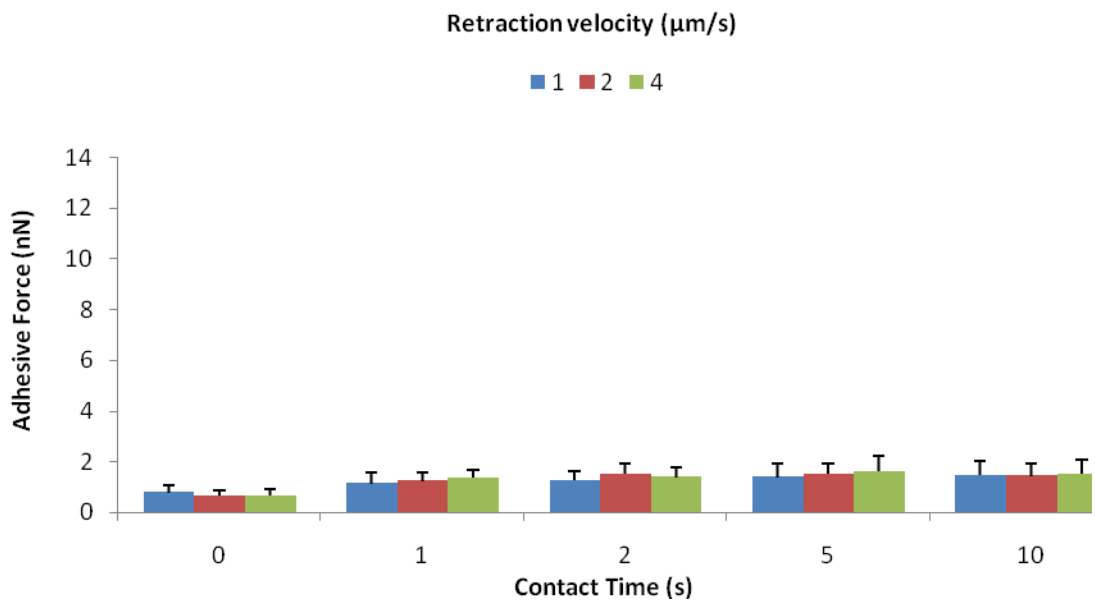

FIGURE S5 Retraction velocity and contact time dependence of *Pseudomonas aeruginosa* adhesive pressure to glass. (A) PAO1 early biofilm. (B) wapR early biofilm. (C) PAO1 mature biofilm. (D) wapR mature biofilm. Means and standard errors of data are shown from three independent experiments per early biofilm sample and two independent experiments per mature biofilm sample. Each experiment consists of 10 replicate force plots for each combination of retraction velocity and contact time.

A

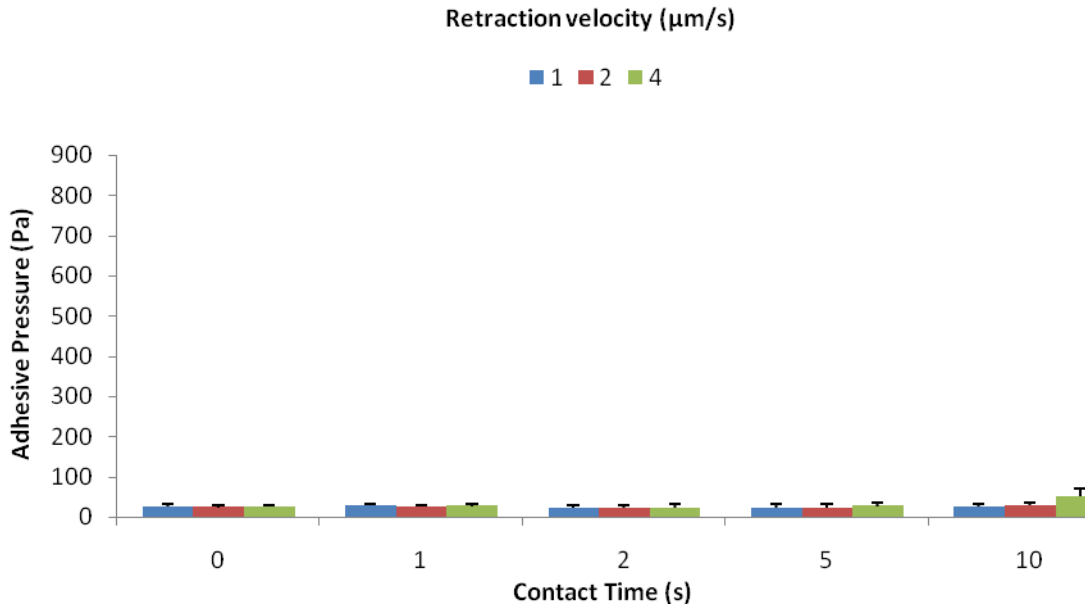

B

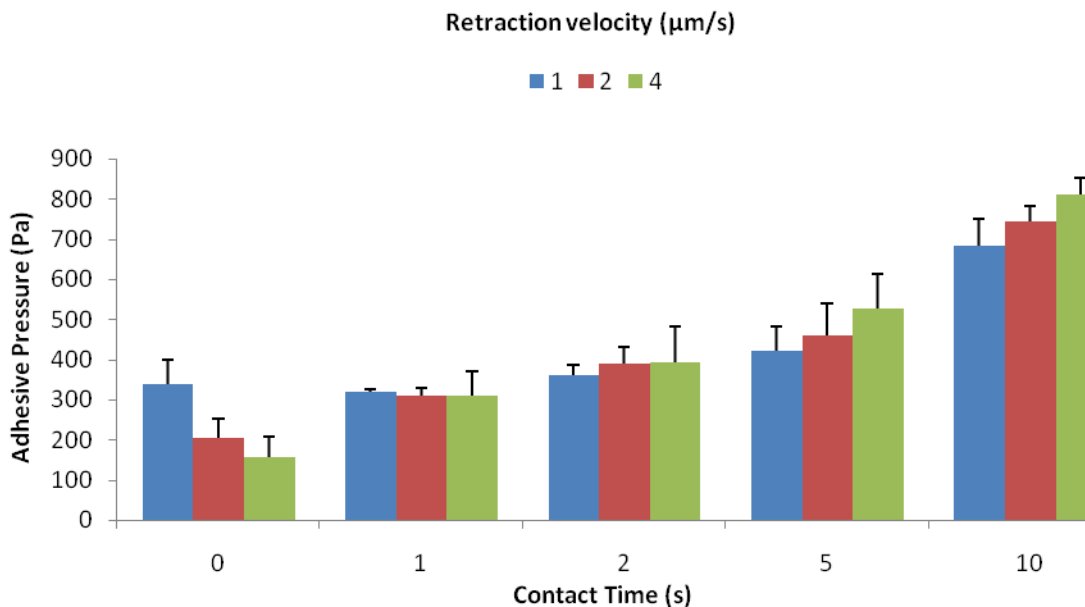

C

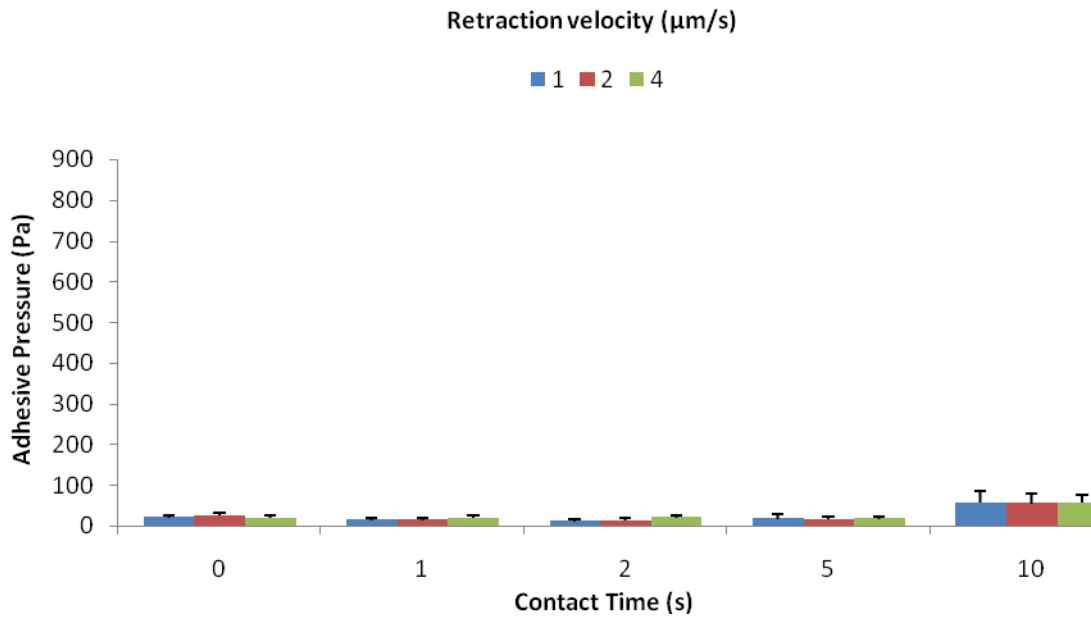

D

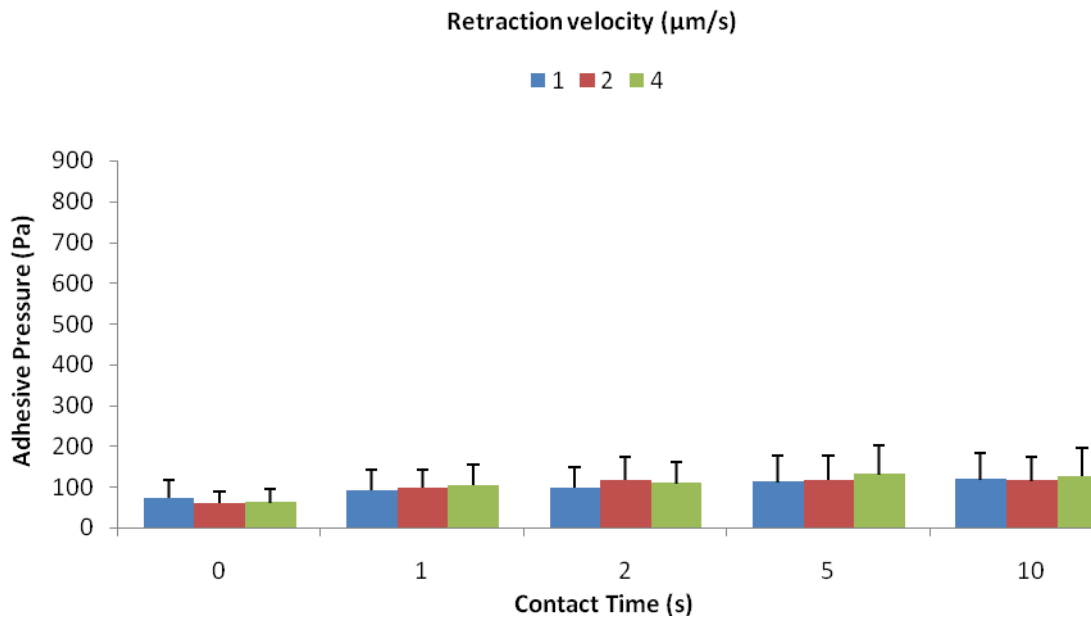

FIGURE S6 Loading force and contact time dependence of *Pseudomonas aeruginosa* adhesive efficiency to glass. (A) PAO1 early biofilm. (B) wapR early biofilm. (C) PAO1 mature biofilm. (D) wapR mature biofilm. Means of data are shown from three independent experiments per early biofilm sample and two independent experiments per mature biofilm sample. Each experiment consists of 10 replicate force plots for each combination of loading force and contact time.

A

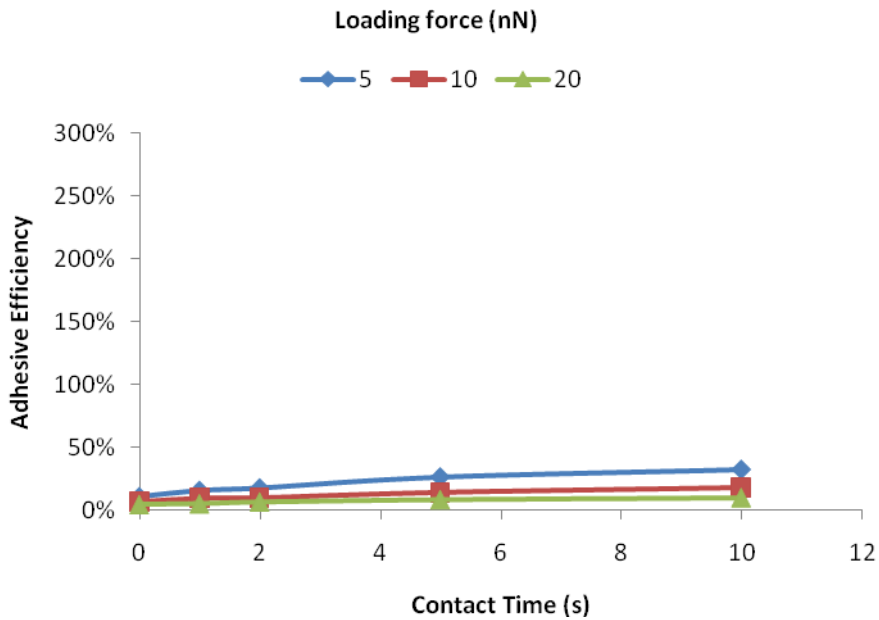

B

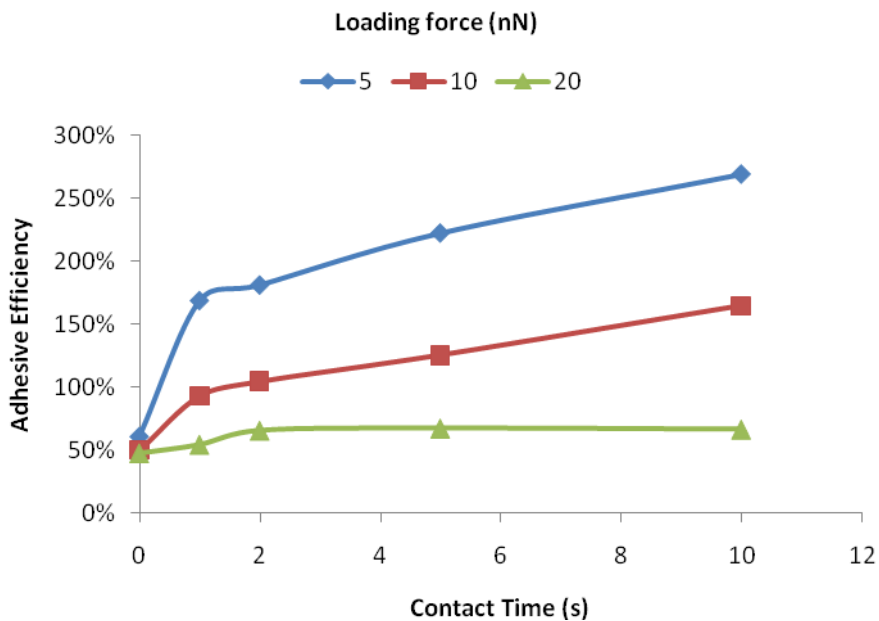

C

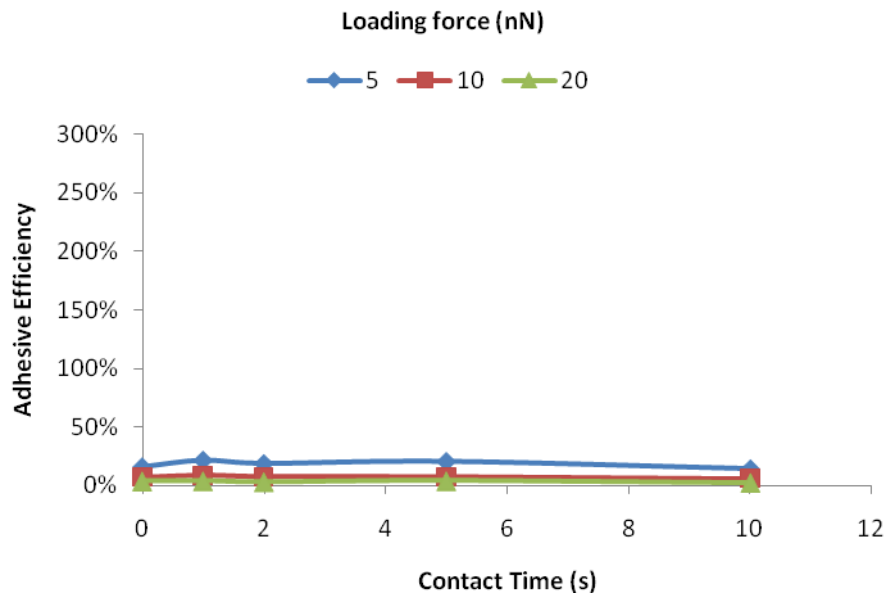

D

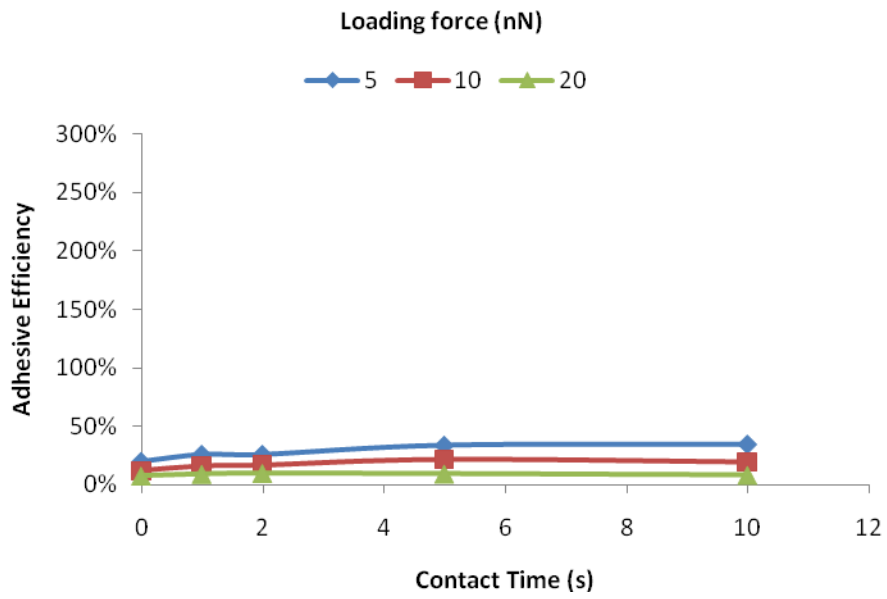

FIGURE S7 Comparison of instantaneous indentations of *Pseudomonas aeruginosa* biofilms at SFTV. Means and standard errors of data are shown from two independent experiments per sample. Each experiment consists of ten replicate force plots under standard load force (10 nN), contact time (1 s) and ramp velocity (2  $\mu\text{m/s}$ ). Indentation data were extracted from the resulting creep curves. PAO1-ebf: PAO1 early biofilm; wapR-ebf: wapR early biofilm; PAO1-mbf: PAO1 mature biofilm; wapR-mbf:wapR mature biofilm.

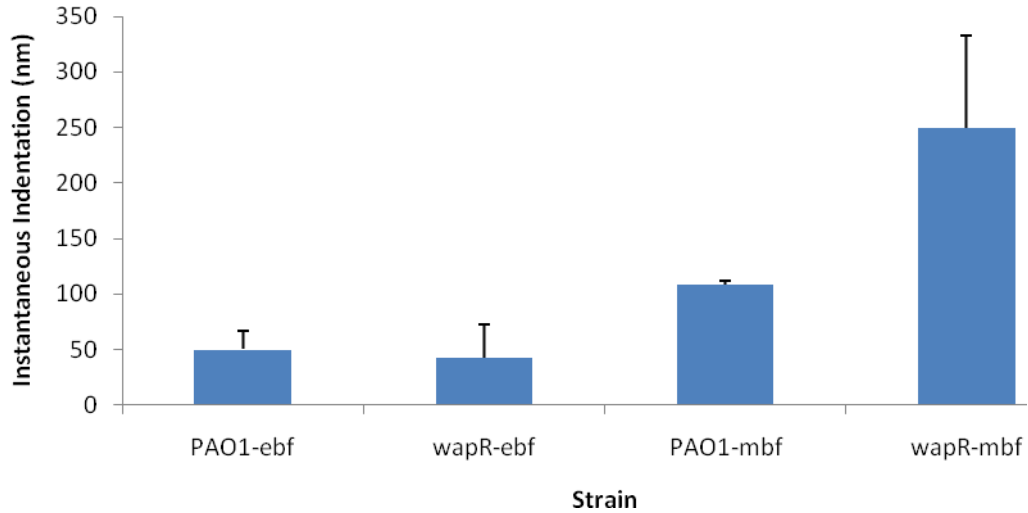

FIGURE S8 Comparison of creep indentations of *Pseudomonas aeruginosa* biofilms at SFTV. Means and standard errors of data are shown from two independent experiments per sample. Each experiment consists of ten replicate force plots under standard load force (10 nN), contact time (1 s) and ramp velocity (2  $\mu\text{m/s}$ ). Indentation data were extracted from the resulting creep curves. PAO1-ebf: PAO1 early biofilm; wapR-ebf: wapR early biofilm; PAO1-mbf: PAO1 mature biofilm; wapR-mbf: wapR mature biofilm.

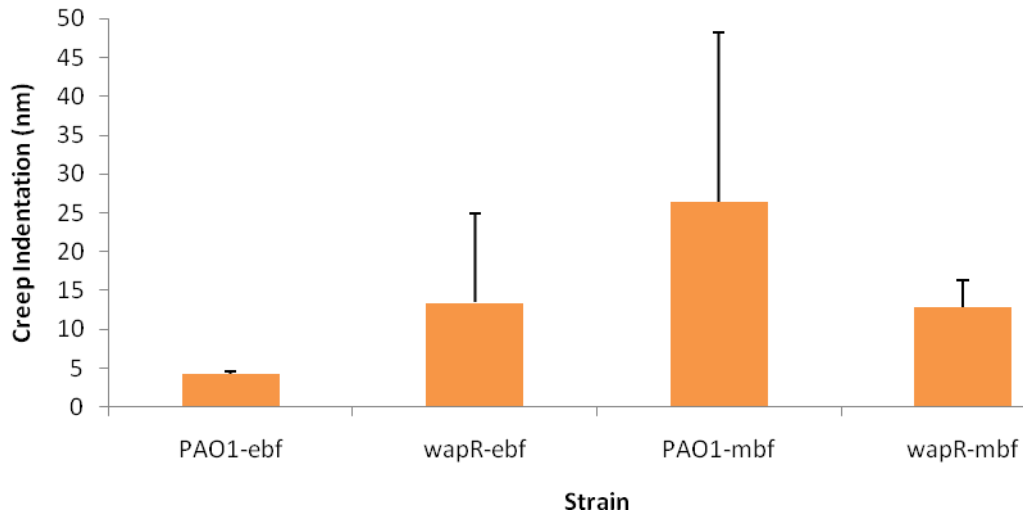

Supplement: mmc1.pdf [file mmc1.pdf]
